# Supplementary material for: Chemical Composition, Antifungal and Anti-Biofilm Activities of Volatile Fractions of Convolvulus althaeoides L. Roots from Tunisia
Source: MDPI journal article supplement (doi:10.3390/molecules27206834), 2022-10-12
Supplement: s1 [file s1]

## Article

# Chemical Composition, Antifungal and Anti-biofilm Activities of Volatile Fractions of *Convolvulus althaeoides* L. Roots from Tunisia

Soukaina Hrichi <sup>1</sup>, Raja Chaâbane-Banaoues <sup>2</sup>, Filippo Alibrando <sup>3</sup>, Ammar B. Altemimi <sup>4,5</sup>, Oussama Babba <sup>2</sup>, Yassine Oulad El Majdoub <sup>6</sup>, Habib Nasri <sup>1</sup>, Luigi Mondello <sup>3,6,7</sup>, Hamouda Babba <sup>2</sup>, Zine Mighri <sup>1</sup> and Francesco Cacciola <sup>8,\*</sup>

<sup>1</sup> Laboratory of Physico-Chemistry of Materials, Faculty of Sciences of Monastir, University of Monastir, 5000 Monastir, Tunisia

<sup>2</sup> Laboratory of Parasitology and Mycology (LP3M), Department of Clinical Biology, Faculty of Pharmacy of Monastir, University of Monastir, 5000 Monastir, Tunisia

<sup>3</sup> Chromaleont s.r.l., c/o Department of Chemical, Biological, Pharmaceutical and Environmental Sciences, University of Messina, 98122 Messina, Italy

<sup>4</sup> Department of Food Science, College of Agriculture, University of Basrah, 61004 Basraq, Iraq

<sup>5</sup> College of Medicine, University of Warith Al-Anbiyaa, Karbala 56001, Iraq

<sup>6</sup> Department of Chemical, Biological, Pharmaceutical and Environmental Sciences, University of Messina, 98122 Messina, Italy

<sup>7</sup> Department of Sciences and Technologies for Human and Environment, University Campus Bio-Medico of Rome, 00128 Rome, Italy

<sup>8</sup> Department of Biomedical, Dental, Morphological and Functional Imaging Sciences, University of Messina, 98122 Messina, Italy

\* Correspondence: cacciola@unime.it

**Table S1.** List of volatile compounds detected in the hexane fraction (VF1) of *C. althaeoides* L. roots by GC-MS.

| N. Peak | Compound                    | Area% | LRI (lib) | LRI (exp) | Library   | Compound Class         | Formula                                         |
|---------|-----------------------------|-------|-----------|-----------|-----------|------------------------|-------------------------------------------------|
| 1       | Hexan-3-ol                  | 0.03  | 795       | 799       | FFNSC 4.0 | Alcohol                | C <sub>6</sub> H <sub>14</sub> O                |
| 2       | <i>n</i> -Hexanal           | 0.07  | 801       | 802       | FFNSC 4.0 | Aldehyde               | C <sub>6</sub> H <sub>12</sub> O                |
| 3       | Benzaldehyde                | 0.07  | 960       | 963       | FFNSC 4.0 | Aldehyde               | C <sub>7</sub> H <sub>6</sub> O                 |
| 4       | 1-Octen-3-ol                | 0.21  | 978       | 979       | FFNSC 4.0 | Alcohol                | C <sub>8</sub> H <sub>16</sub> O                |
| 5       | <i>n</i> -Octanal           | 0.02  | 1006      | 1004      | FFNSC 4.0 | Aldehyde               | C <sub>8</sub> H <sub>16</sub> O                |
| 6       | 2-Ethylhexanol              | 0.17  | 1030      | 1029      | FFNSC 4.0 | Alcohol                | C <sub>8</sub> H <sub>18</sub> O                |
| 7       | Benzyl alcohol              | 0.17  | 1040      | 1037      | FFNSC 4.0 | Alcohol                | C <sub>7</sub> H <sub>8</sub> O                 |
| 8       | ( <i>E</i> )-Linalool oxide | 0.06  | 1086      | 1087      | FFNSC 4.0 | Oxygenated monoterpene | C <sub>10</sub> H <sub>18</sub> O <sub>2</sub>  |
| 9       | Guaiacol                    | 0.05  | 1104      | 1089      | FFNSC 4.0 | Alcohol                | C <sub>7</sub> H <sub>8</sub> O <sub>2</sub>    |
| 10      | Linalyl anthranilate        | 0.23  | 1104      | 1101      | FFNSC 4.0 | Ester                  | C <sub>17</sub> H <sub>23</sub> NO <sub>2</sub> |
| 11      | <i>n</i> -Nonanal           | 0.14  | 1107      | 1105      | FFNSC 4.0 | Aldehyde               | C <sub>9</sub> H <sub>18</sub> O                |
| 12      | Phenethyl alcohol           | 0.11  | 1113      | 1115      | FFNSC 4.0 | Alcohol                | C <sub>8</sub> H <sub>10</sub> O                |
| 13      | Dodec-1-ene                 | 0.2   | 1191      | 1191      | FFNSC 4.0 | Alkene                 | C <sub>12</sub> H <sub>24</sub>                 |
| 14      | $\alpha$ -Terpineol         | 0.17  | 1195      | 1197      | FFNSC 4.0 | Oxygenated monoterpene | C <sub>10</sub> H <sub>18</sub> O               |
| 15      | Myrtenol                    | 0.93  | 1202      | 1198      | FFNSC 4.0 | Oxygenated monoterpene | C <sub>10</sub> H <sub>16</sub> O               |
| 16      | <i>n</i> -Decanal           | 0.12  | 1208      | 1207      | FFNSC 4.0 | Aldehyde               | C <sub>10</sub> H <sub>20</sub> O               |
| 17      | Cuminaldehyde               | 0.79  | 1243      | 1245      | FFNSC 4.0 | Oxygenated monoterpene | C <sub>10</sub> H <sub>12</sub> O               |

|    |                                                                                          |       |      |      |           |                           |                                                 |
|----|------------------------------------------------------------------------------------------|-------|------|------|-----------|---------------------------|-------------------------------------------------|
| 18 | Carvone                                                                                  | 1.77  | 1246 | 1246 | FFNSC 4.0 | Oxygenated monoterpene    | C <sub>10</sub> H <sub>14</sub> O               |
| 19 | Geraniol                                                                                 | 0.13  | 1255 | 1253 | FFNSC 4.0 | Oxygenated monoterpene    | C <sub>10</sub> H <sub>18</sub> O               |
| 20 | 4-Vinylguaiaicol                                                                         | 12.2  | 1309 | 1315 | FFNSC 4.0 | Alcohol                   | C <sub>9</sub> H <sub>10</sub> O <sub>2</sub>   |
| 21 | Methyl 4-formylbenzoate                                                                  | 1.03  | -    | 1370 | W11N17    | Ester                     | C <sub>9</sub> H <sub>8</sub> O <sub>3</sub>    |
| 22 | Butyl benzoate                                                                           | 0.19  | 1376 | 1375 | FFNSC 4.0 | Ester                     | C <sub>11</sub> H <sub>14</sub> O <sub>2</sub>  |
| 23 | (E), β-Damascenone                                                                       | 0.13  | 1379 | 1380 | FFNSC 4.0 | Apocarotene               | C <sub>13</sub> H <sub>18</sub> O               |
| 24 | Tetradec-1-ene                                                                           | 0.9   | 1379 | 1391 | FFNSC 4.0 | Alkene                    | C <sub>14</sub> H <sub>28</sub>                 |
| 25 | n-Tetradecane                                                                            | 0.32  | 1400 | 1400 | FFNSC 4.0 | Alkane                    | C <sub>14</sub> H <sub>30</sub>                 |
| 26 | α-Methoxynaphthalene                                                                     | 1.52  | 1450 | 1453 | FFNSC 4.0 | Alkene                    | C <sub>11</sub> H <sub>10</sub> O               |
| 27 | n-Pentadecane                                                                            | 0.22  | 1500 | 1499 | FFNSC 4.0 | Alkane                    | C <sub>15</sub> H <sub>32</sub>                 |
| 28 | 2,4-Bis(1,1-dimethylethyl)-phenol                                                        | 1.47  | -    | 1509 | W11N17    | Alcohol                   | C <sub>14</sub> H <sub>22</sub> O               |
| 29 | 3-Nonyl-tiglate                                                                          | 0.27  | 1504 | 1514 | FFNSC 4.0 | Ester                     | C <sub>14</sub> H <sub>26</sub> O <sub>2</sub>  |
| 30 | 2-[[[4-(4-hydroxy-4-methylpentyl)-, 3-cyclohexen-1-yl]methylene]amino]-, Methyl-benzoate | 0.89  | 1589 | 1590 | FFNSC 4.0 | Ester                     | C <sub>21</sub> H <sub>29</sub> NO <sub>3</sub> |
| 31 | n-Hexadecene                                                                             | 1.1   | 1593 | 1592 | FFNSC 4.0 | Alkene                    | C <sub>16</sub> H <sub>32</sub>                 |
| 32 | n-Hexadecane                                                                             | 0.21  | 1600 | 1599 | FFNSC 4.0 | Alkane                    | C <sub>16</sub> H <sub>34</sub>                 |
| 33 | Benzophenone                                                                             | 0.32  | 1627 | 1631 | FFNSC 4.0 | Apocarotene               | C <sub>13</sub> H <sub>10</sub> O               |
| 34 | Hedione                                                                                  | 0.19  | 1650 | 1652 | FFNSC 4.0 | Apocarotene               | C <sub>13</sub> H <sub>22</sub> O <sub>3</sub>  |
| 35 | Cadalene                                                                                 | 0.11  | 1677 | 1676 | FFNSC 4.0 | Sesquiterpene hydrocarbon | C <sub>15</sub> H <sub>18</sub>                 |
| 36 | n-Heptadecane                                                                            | 0.13  | 1700 | 1699 | FFNSC 4.0 | Alkane                    | C <sub>17</sub> H <sub>36</sub>                 |
| 37 | Pentadecanal                                                                             | 0.15  | -    | 1715 | W11N17    | Aldehyde                  | C <sub>15</sub> H <sub>30</sub> O               |
| 38 | n-Pentadecanol                                                                           | 0.17  | 1782 | 1786 | FFNSC 4.0 | Alcohol                   | C <sub>15</sub> H <sub>32</sub> O               |
| 39 | Octadec-1-ene                                                                            | 1.03  | 1793 | 1792 | FFNSC 4.0 | Alkene                    | C <sub>18</sub> H <sub>36</sub>                 |
| 40 | n-Octadecane                                                                             | 0.27  | 1800 | 1799 | FFNSC 4.0 | Alkane                    | C <sub>18</sub> H <sub>38</sub>                 |
| 41 | Phytone                                                                                  | 0.32  | 1841 | 1841 | FFNSC 4.0 | Ketone                    | C <sub>18</sub> H <sub>36</sub> O               |
| 42 | diisobutyl phthalate                                                                     | 1.55  | 1858 | 1860 | FFNSC 4.0 | Ester                     | C <sub>16</sub> H <sub>22</sub> O <sub>4</sub>  |
| 43 | Pentadecylic acid                                                                        | 0.42  | 1869 | 1870 | FFNSC 4.0 | Oxygenated sesquiterpene  | C <sub>15</sub> H <sub>30</sub> O <sub>2</sub>  |
| 44 | n-Hexadecanol                                                                            | 0.36  | 1884 | 1884 | FFNSC 4.0 | Alcohol                   | C <sub>16</sub> H <sub>34</sub> O               |
| 45 | n-Nonadecane                                                                             | 0.28  | 1900 | 1899 | FFNSC 4.0 | Alkane                    | C <sub>19</sub> H <sub>40</sub>                 |
| 46 | 7,9-Di-tert-butyl-1-oxaspiro(4,5)deca-6,9-diene-2,8-dione                                | 0.65  | -    | 1905 | W11N17    | Apocarotene               | C <sub>17</sub> H <sub>24</sub> O <sub>3</sub>  |
| 47 | Methyl hexadecanoate                                                                     | 0.51  | 1925 | 1925 | FFNSC 4.0 | Fatty acid                | C <sub>17</sub> H <sub>34</sub> O <sub>2</sub>  |
| 48 | n-Hexadecanoic acid                                                                      | 29.77 | 1977 | 1983 | FFNSC 4.0 | Fatty acid                | C <sub>16</sub> H <sub>32</sub> O <sub>2</sub>  |
| 49 | n-Eicosene                                                                               | 3.98  | 1994 | 1993 | FFNSC 4.0 | Alkene                    | C <sub>20</sub> H <sub>40</sub>                 |
| 50 | n-Eicosane                                                                               | 2.11  | 2000 | 1999 | FFNSC 4.0 | Alkane                    | C <sub>20</sub> H <sub>42</sub>                 |
| 51 | n-Octadecanol                                                                            | 2.89  | 2081 | 2087 | FFNSC 4.0 | Alcohol                   | C <sub>18</sub> H <sub>38</sub> O               |
| 52 | 5-dodecyldihydro-2(3H)-furanone                                                          | 0.52  | -    | 2104 | W11N17    | Ketone                    | C <sub>16</sub> H <sub>30</sub> O <sub>2</sub>  |
| 53 | Ethyl linoleate                                                                          | 1.75  | 2164 | 2160 | FFNSC 4.0 | Fatty acid                | C <sub>20</sub> H <sub>36</sub> O <sub>2</sub>  |
| 54 | Ethyl linolenate                                                                         | 1.47  | 2165 | 2166 | FFNSC 4.0 | Fatty acid                | C <sub>20</sub> H <sub>34</sub> O <sub>2</sub>  |
| 55 | n-Docosane                                                                               | 0.4   | 2200 | 2199 | FFNSC 4.0 | Alkane                    | C <sub>22</sub> H <sub>46</sub>                 |
| 56 | n-Tricosane                                                                              | 0.81  | 2300 | 2299 | FFNSC 4.0 | Alkane                    | C <sub>23</sub> H <sub>48</sub>                 |

|    |                                                       |      |      |      |           |                 |                                                |
|----|-------------------------------------------------------|------|------|------|-----------|-----------------|------------------------------------------------|
| 57 | Bis(2-ethylhexyl)-adipate                             | 9.69 | 2392 | 2391 | FFNSC 4.0 | Ester           | C <sub>22</sub> H <sub>42</sub> O <sub>4</sub> |
| 58 | <i>n</i> -Tetracosane                                 | 1.23 | 2400 | 2399 | FFNSC 4.0 | Alkane          | C <sub>24</sub> H <sub>50</sub>                |
| 59 | <i>n</i> -Pentacosane                                 | 1.59 | 2500 | 2499 | FFNSC 4.0 | Alkane          | C <sub>25</sub> H <sub>52</sub>                |
| 60 | Bis(2-ethylhexyl)-phthalate                           | 0.69 | 2531 | 2532 | FFNSC 4.0 | Ester           | C <sub>24</sub> H <sub>38</sub> O <sub>4</sub> |
| 61 | 2-Methylpentacosane                                   | 0.11 | -    | 2561 | W11N17    | Alkane          | C <sub>26</sub> H <sub>54</sub>                |
| 62 | <i>n</i> -Hexacosane                                  | 1.77 | 2600 | 2598 | FFNSC 4.0 | Alkane          | C <sub>26</sub> H <sub>54</sub>                |
| 63 | 2-Methylhexacosane                                    | 0.1  | -    | 2671 | W11N17    | Alkane          | C <sub>27</sub> H <sub>56</sub>                |
| 64 | <i>n</i> -Heptacosane                                 | 1.64 | 2700 | 2699 | FFNSC 4.0 | Alkane          | C <sub>27</sub> H <sub>56</sub>                |
| 65 | 2-Methylheptacosane                                   | 0.06 | -    | 2771 | W11N17    | Alkane          | C <sub>28</sub> H <sub>58</sub>                |
| 66 | <i>n</i> -Octacosane                                  | 1.37 | 2800 | 2798 | FFNSC 4.0 | Alkane          | C <sub>28</sub> H <sub>58</sub>                |
| 67 | Squalene                                              | 0.28 | 2810 | 2811 | FFNSC 4.0 | Triterpene      | C <sub>30</sub> H <sub>50</sub>                |
| 68 | <i>n</i> -Nonacosane                                  | 1.12 | 900  | 2898 | FFNSC 4.0 | Alkane          | C <sub>29</sub> H <sub>60</sub>                |
| 69 | <i>n</i> -Triacontane                                 | 0.69 | 3000 | 2998 | FFNSC 4.0 | Alkane          | C <sub>30</sub> H <sub>62</sub>                |
| 70 | <i>n</i> -Hentriacontane                              | 0.47 | 3100 | 3098 | FFNSC 4.0 | Alkane          | C <sub>31</sub> H <sub>64</sub>                |
| 71 | <i>n</i> -Dotriacontane                               | 0.31 | 3200 | 3199 | FFNSC 4.0 | Alkane          | C <sub>32</sub> H <sub>66</sub>                |
| 72 | <i>n</i> -Tritriacontane                              | 0.12 | 3300 | 3298 | FFNSC 4.0 | Alkane          | C <sub>33</sub> H <sub>68</sub>                |
| 73 | 3,5-bis(1,1-dimethylthyl)-4-hydroxy-, octadecyl ester | 2.71 | -    | 3596 | W11N17    | Carboxylic acid | C <sub>35</sub> H <sub>62</sub> O <sub>3</sub> |

FFNSC: Flavor and Fragrance Natural and Synthetic Compounds; LRI: Linear Retention Indices; W11N17: Wiley11-Nist17.

**Table S2.** List of volatile compounds detected in the chloroform fraction (VF2) of *C. althaeoides* L. roots by GC-MS.

| N. Peak | Compound                | Area% | LRI (lib) | LRI (exp) | Library   | Compound Class              | Formula                                         |
|---------|-------------------------|-------|-----------|-----------|-----------|-----------------------------|-------------------------------------------------|
| 1       | 1-Methyl- cyclopentanol | 0.07  | -         | 798       | W11N17    | Alcohol                     | C <sub>6</sub> H <sub>12</sub> O                |
| 2       | Hexan-3-ol              | 0.07  | 795       | 799       | FFNSC 4.0 | Alcohol                     | C <sub>6</sub> H <sub>14</sub> O                |
| 3       | Hexan-2-ol              | 0.91  | 802       | 812       | FFNSC 4.0 | Alcohol                     | C <sub>6</sub> H <sub>14</sub> O                |
| 4       | Furfural                | 3.24  | 845       | 832       | FFNSC 4.0 | Aldehyde                    | C <sub>5</sub> H <sub>4</sub> O <sub>2</sub>    |
| 5       | Furfuryl alcohol        | 0.3   | 849       | 852       | FFNSC 4.0 | Alcohol                     | C <sub>5</sub> H <sub>6</sub> O <sub>2</sub>    |
| 6       | Hex-(3Z)-enol           | 0.37  | 853       | 852       | FFNSC 4.0 | Alcohol                     | C <sub>6</sub> H <sub>12</sub> O                |
| 7       | <i>n</i> -Hexanol       | 0.23  | 867       | 866       | FFNSC 4.0 | Alcohol                     | C <sub>6</sub> H <sub>14</sub> O                |
| 8       | 2-acetyl-furan          | 0.1   | 913       | 911       | FFNSC 4.0 | Ketone                      | C <sub>6</sub> H <sub>8</sub> ClO <sub>2</sub>  |
| 9       | β-Lutidine              | 1.29  | 955       | 955       | FFNSC 4.0 | Pyridine                    | C <sub>7</sub> H <sub>9</sub> N                 |
| 10      | 5-Methyl furfural       | 0.21  | 960       | 961       | FFNSC 4.0 | Aldehyde                    | C <sub>6</sub> H <sub>6</sub> O <sub>2</sub>    |
| 11      | Benzaldehyde            | 0.75  | 960       | 963       | FFNSC 4.0 | Aldehyde                    | C <sub>7</sub> H <sub>6</sub> O                 |
| 12      | 3-Ethenylpyridine       | 2.43  | -         | 966       | W11N17    | Pyridine                    | C <sub>7</sub> H <sub>7</sub> N                 |
| 13      | 1-Octen-3-ol            | 0.1   | 978       | 980       | FFNSC 4.0 | Alcohol                     | C <sub>8</sub> H <sub>16</sub> O                |
| 14      | 2,4,6-Trimethylpyridine | 0.16  | 986       | 990       | FFNSC 4.0 | Pyridine                    | C <sub>8</sub> H <sub>11</sub> N                |
| 15      | <i>n</i> -Hexanoic acid | 1.91  | 997       | 1004      | FFNSC 4.0 | Carboxylic acid             | C <sub>6</sub> H <sub>12</sub> O <sub>2</sub>   |
| 16      | 2-Ethyl-hexanol         | 0.07  | 1030      | 1029      | FFNSC 4.0 | Hexanol                     | C <sub>6</sub> H <sub>14</sub> O <sub>2</sub>   |
| 17      | Benzyl alcohol          | 7.86  | 1040      | 1037      | FFNSC 4.0 | Alcohol                     | C <sub>7</sub> H <sub>8</sub> O                 |
| 18      | Phenylacetaldehyde      | 0.1   | 1045      | 1045      | FFNSC 4.0 | Aldehyde                    | C <sub>8</sub> H <sub>8</sub> O                 |
| 19      | γ-Hexalactone           | 0.09  | 1060      | 1053      | FFNSC 4.0 | Ester                       | C <sub>6</sub> H <sub>10</sub> O <sub>2</sub>   |
| 20      | <i>o</i> -Cresol        | 0.11  | 1051      | 1055      | FFNSC 4.0 | Alcohol                     | C <sub>7</sub> H <sub>8</sub> O                 |
| 21      | Diethyl malonate        | 0.19  | 1071      | 1068      | FFNSC 4.0 | Oxygenated monoter-<br>pene | C <sub>10</sub> H <sub>16</sub> O <sub>5</sub>  |
| 22      | (Z)-Linalool oxide      | 0.3   | 1069      | 1071      | FFNSC 4.0 | Oxygenated monoter-<br>pene | C <sub>10</sub> H <sub>18</sub> O <sub>2</sub>  |
| 23      | 2-Methoxyphenol         | 1.27  | -         | 1088      | W11N17    | Alcohol                     | C <sub>7</sub> H <sub>8</sub> O <sub>2</sub>    |
| 24      | Linalyl anthranilate    | 0.16  | 1104      | 1101      | FFNSC 4.0 | Ester                       | C <sub>17</sub> H <sub>23</sub> NO <sub>2</sub> |

|    |                                                                                                            |      |      |      |           |                                |                                                 |
|----|------------------------------------------------------------------------------------------------------------|------|------|------|-----------|--------------------------------|-------------------------------------------------|
| 25 | <i>n</i> -Nonanal                                                                                          | 0.22 | 1107 | 1106 | FFNSC 4.0 | Aldehyde                       | C <sub>9</sub> H <sub>18</sub> O                |
| 26 | 1-(3-Pyridinyl)-ethanone                                                                                   | 0.07 | -    | 1112 | W11N17    | Pyridine                       | C <sub>7</sub> H <sub>7</sub> NO                |
| 27 | Phenethyl alcohol                                                                                          | 2.07 | 1113 | 1115 | FFNSC 4.0 | Alcohol                        | C <sub>8</sub> H <sub>10</sub> O                |
| 28 | Methyl nicotinate                                                                                          | 0.81 | 1142 | 1140 | FFNSC 4.0 | Ester                          | C <sub>7</sub> H <sub>7</sub> NO <sub>2</sub>   |
| 29 | Oxophorone                                                                                                 | 0.07 | 1148 | 1146 | FFNSC 4.0 | Ketone                         | C <sub>9</sub> H <sub>12</sub> O <sub>2</sub>   |
| 30 | Benzyl acetate                                                                                             | 0.06 | -    | 1164 | W11N17    | Ester                          | C <sub>9</sub> H <sub>10</sub> O <sub>2</sub>   |
| 31 | Dodec-1-ene                                                                                                | 0.12 | 1191 | 1191 | FFNSC 4.0 | Alkene                         | C <sub>12</sub> H <sub>24</sub>                 |
| 32 | α-Terpineol                                                                                                | 0.07 | 1195 | 1197 | FFNSC 4.0 | Oxygenated monoter-<br>pene    | C <sub>10</sub> H <sub>18</sub> O               |
| 33 | Myrtenol                                                                                                   | 0.46 | 1202 | 1199 | FFNSC 4.0 | Oxygenated monoter-<br>pene    | C <sub>10</sub> H <sub>16</sub> O               |
| 34 | <i>n</i> -Decanal                                                                                          | 0.21 | 1208 | 1207 | FFNSC 4.0 | Aldehyde                       | C <sub>10</sub> H <sub>20</sub> O               |
| 35 | 4-Vinylphenol                                                                                              | 0.98 | 1217 | 1223 | FFNSC 4.0 | Alcohol                        | C <sub>8</sub> H <sub>8</sub> O                 |
| 36 | Benzosulfonazole                                                                                           | 0.08 | 1226 | 1227 | FFNSC 4.0 | -                              | C <sub>7</sub> H <sub>5</sub> NS                |
| 37 | 1-Azanaphthalene                                                                                           | 0.11 | 1237 | 1240 | FFNSC 4.0 | Pyridine                       | C <sub>9</sub> H <sub>7</sub> N                 |
| 38 | Cuminaldehyde                                                                                              | 0.23 | 1243 | 1244 | FFNSC 4.0 | Oxygenated monoter-<br>pene    | C <sub>10</sub> H <sub>12</sub> O               |
| 39 | Carvone                                                                                                    | 0.68 | 1246 | 1246 | FFNSC 4.0 | Oxygenated monoter-<br>pene    | C <sub>10</sub> H <sub>14</sub> O               |
| 40 | <i>p</i> -Anisaldehyde                                                                                     | 0.14 | 1257 | 1258 | FFNSC 4.0 | Aldehyde                       | C <sub>8</sub> H <sub>8</sub> O <sub>2</sub>    |
| 41 | Benzopyridine                                                                                              | 1    | 1259 | 1263 | FFNSC 4.0 | Pyridine                       | C <sub>9</sub> H <sub>7</sub> N                 |
| 42 | <i>p</i> -Cymen-7-ol                                                                                       | 0.23 | 1291 | 1295 | FFNSC 4.0 | Oxygenated monoter-<br>pene    | C <sub>10</sub> H <sub>14</sub> O               |
| 43 | 4-Vinylguaiaicol                                                                                           | 2.87 | 1309 | 1314 | FFNSC 4.0 | Alcohol                        | C <sub>7</sub> H <sub>8</sub> O <sub>2</sub>    |
| 44 | γ-Nonalactone                                                                                              | 0.18 | 1362 | 1362 | FFNSC 4.0 | Ester                          | C <sub>9</sub> H <sub>16</sub> O <sub>2</sub>   |
| 45 | Methyl 4-formylbenzoate                                                                                    | 0.76 | -    | 1370 | W11N17    | Ester                          | C <sub>9</sub> H <sub>8</sub> O <sub>3</sub>    |
| 46 | Tetradec-1-ene                                                                                             | 0.25 | 1392 | 1391 | FFNSC 4.0 | Alkene                         | C <sub>14</sub> H <sub>28</sub>                 |
| 47 | Vanillin                                                                                                   | 1.49 | 1394 | 1399 | FFNSC 4.0 | Aldehyde                       | C <sub>8</sub> H <sub>8</sub> O <sub>3</sub>    |
| 48 | bis-1,1'-(1,3-phenylene)<br>Ethanone                                                                       | 0.06 | -    | 1434 | W11N17    | Ketone                         | C <sub>14</sub> H <sub>12</sub> O               |
| 49 | 5,6,7,7a-Tetrahydro-<br>4,4,7a-trimethyl-2(4H)-<br>benzofuranone                                           | 0.07 | -    | 1530 | W11N17    | Apocarotene                    | C <sub>11</sub> H <sub>16</sub> O <sub>2</sub>  |
| 50 | 2-[[[4-(4-hydroxy-4-<br>methylpentyl)-, 3-cyclo-<br>hexen-1-yl]meth-<br>ylene]amino]-, Methyl-<br>benzoate | 0.27 | 1589 | 1589 | FFNSC 4.0 | Ester                          | C <sub>21</sub> H <sub>29</sub> NO <sub>3</sub> |
| 51 | <i>n</i> -Hexadecene                                                                                       | 0.51 | 1593 | 1592 | FFNSC 4.0 | Alkene                         | C <sub>16</sub> H <sub>32</sub>                 |
| 52 | <i>n</i> -Hexadecane                                                                                       | 0.17 | 1600 | 1599 | FFNSC 4.0 | Alkane                         | C <sub>16</sub> H <sub>34</sub>                 |
| 53 | 5,7-diepi-alpha-eudesmol                                                                                   | 0.1  | 1610 | 1608 | FFNSC 4.0 | Oxygenated sesquiter-<br>pene  | C <sub>15</sub> H <sub>26</sub> O               |
| 54 | <i>n</i> -Tetradecanal                                                                                     | 0.08 | 1614 | 1614 | FFNSC 4.0 | Alkane                         | C <sub>14</sub> H <sub>28</sub> O               |
| 55 | Benzophenone                                                                                               | 0.1  | 1627 | 1631 | FFNSC 4.0 | Apocarotene                    | C <sub>13</sub> H <sub>10</sub> O               |
| 56 | 1,6-dimethyl-4-(1-meth-<br>ylethyl)-naphthalene                                                            | 0.09 | -    | 1675 | W11N17    | Sesquiterpene hydro-<br>carbon | C <sub>15</sub> H <sub>18</sub>                 |
| 57 | <i>n</i> -Pentadecanal                                                                                     | 0.15 | -    | 1716 | W11N17    | Aldehyde                       | C <sub>15</sub> H <sub>30</sub> O               |
| 58 | (E)-Coniferyl alcohol                                                                                      | 0.64 | 1732 | 1741 | FFNSC 4.0 | Phenylpropanoid                | C <sub>10</sub> H <sub>12</sub> O <sub>3</sub>  |
| 59 | Octadec-1-ene                                                                                              | 0.67 | 1793 | 1792 | FFNSC 4.0 | Alkene                         | C <sub>18</sub> H <sub>36</sub>                 |

|    |                                                       |       |      |      |           |                          |                                                |
|----|-------------------------------------------------------|-------|------|------|-----------|--------------------------|------------------------------------------------|
| 60 | <i>n</i> -Octadecane                                  | 0.16  | 1800 | 1799 | FFNSC 4.0 | Alkane                   | C <sub>18</sub> H <sub>38</sub>                |
| 61 | Phytone                                               | 0.36  | 1841 | 1841 | FFNSC 4.0 | Ketone                   | C <sub>18</sub> H <sub>36</sub> O              |
| 62 | diisobutyl phthalate                                  | 0.63  | 1858 | 1860 | FFNSC 4.0 | Ester                    | C <sub>16</sub> H <sub>22</sub> O <sub>4</sub> |
| 63 | Pentadecylic acid                                     | 0.36  | 1869 | 1870 | FFNSC 4.0 | Oxygenated sesquiterpene | C <sub>15</sub> H <sub>30</sub> O <sub>2</sub> |
| 64 | <i>n</i> -Hexadecanol                                 | 0.2   | 1884 | 1883 | FFNSC 4.0 | Alcohol                  | C <sub>16</sub> H <sub>34</sub> O              |
| 65 | Methyl hexadecanoate                                  | 0.43  | 1925 | 1936 | FFNSC 4.0 | Fatty acid               | C <sub>17</sub> H <sub>34</sub> O <sub>2</sub> |
| 66 | <i>n</i> -Hexadecanoic acid                           | 34.01 | 1977 | 1983 | FFNSC 4.0 | Fatty acid               | C <sub>16</sub> H <sub>32</sub> O <sub>2</sub> |
| 67 | <i>n</i> -Octadecanol                                 | 3.53  | 2081 | 2087 | FFNSC 4.0 | Alcohol                  | C <sub>18</sub> H <sub>38</sub> O              |
| 68 | 5-Dodecyldihydro-2(3 <i>H</i> )-furanone              | 0.58  | -    | 2104 | W11N17    | Ketone                   | C <sub>16</sub> H <sub>30</sub> O <sub>2</sub> |
| 69 | Linoleic acid                                         | 7.3   | 2144 | 2154 | FFNSC 4.0 | Fatty acid               | C <sub>18</sub> H <sub>32</sub> O <sub>2</sub> |
| 70 | <i>n</i> -Docosane                                    | 2.43  | 2200 | 2199 | FFNSC 4.0 | Alkane                   | C <sub>22</sub> H <sub>46</sub>                |
| 71 | <i>n</i> -Tricosane                                   | 0.52  | 2300 | 2299 | FFNSC 4.0 | Alkane                   | C <sub>23</sub> H <sub>48</sub>                |
| 72 | Bis(2-ethylhexyl)-adipate                             | 3.57  | 2392 | 2390 | FFNSC 4.0 | Ester                    | C <sub>22</sub> H <sub>42</sub> O <sub>4</sub> |
| 73 | <i>n</i> -Tetracosane                                 | 0.35  | 2400 | 2399 | FFNSC 4.0 | Alkane                   | C <sub>24</sub> H <sub>50</sub>                |
| 74 | <i>n</i> -Pentacosane                                 | 1.47  | 2500 | 2499 | FFNSC 4.0 | Alkane                   | C <sub>25</sub> H <sub>52</sub>                |
| 75 | Bis(2-ethylhexyl)-phthalate                           | 0.79  | 2531 | 2532 | FFNSC 4.0 | Ester                    | C <sub>24</sub> H <sub>38</sub> O <sub>4</sub> |
| 76 | Benzyl hexadecenoate                                  | 0.33  | -    | 2578 | W11N17    | Ester                    | C <sub>23</sub> H <sub>38</sub> O <sub>2</sub> |
| 77 | <i>n</i> -Hexacosane                                  | 0.43  | 2600 | 2598 | FFNSC 4.0 | Alkane                   | C <sub>26</sub> H <sub>54</sub>                |
| 78 | <i>n</i> -Heptacosane                                 | 0.78  | 2700 | 2699 | FFNSC 4.0 | Alkane                   | C <sub>27</sub> H <sub>56</sub>                |
| 79 | <i>n</i> -Octacosane                                  | 0.61  | 2800 | 2799 | FFNSC 4.0 | Alkane                   | C <sub>28</sub> H <sub>58</sub>                |
| 80 | Squalene                                              | 0.34  | 2810 | 2811 | FFNSC 4.0 | Triterpene               | C <sub>30</sub> H <sub>50</sub>                |
| 81 | <i>n</i> -Nonacosane                                  | 0.56  | 2900 | 2899 | FFNSC 4.0 | Alkane                   | C <sub>29</sub> H <sub>60</sub>                |
| 82 | <i>n</i> -Triacontane                                 | 0.34  | 3000 | 2998 | FFNSC 4.0 | Alkane                   | C <sub>30</sub> H <sub>62</sub>                |
| 83 | <i>n</i> -Hentriacontane                              | 0.3   | 3100 | 3098 | FFNSC 4.0 | Alkane                   | C <sub>31</sub> H <sub>64</sub>                |
| 84 | <i>n</i> -Dotriacontane                               | 0.18  | 3200 | 3199 | FFNSC 4.0 | Alkane                   | C <sub>32</sub> H <sub>66</sub>                |
| 85 | <i>n</i> -Tritriacontane                              | 0.13  | 3300 | 3299 | FFNSC 4.0 | Alkane                   | C <sub>33</sub> H <sub>68</sub>                |
| 86 | 3,5-bis(1,1-dimethylthyl)-4-hydroxy-, octadecyl ester | 0.95  | -    | 3595 | W11N17    | Carboxylic acid          | C <sub>35</sub> H <sub>62</sub> O <sub>3</sub> |

FFNSC: Flavor and Fragrance Natural and Synthetic Compounds; LRI: Linear Retention Indices; W11N17: Wiley11-Nist17.
